1 How do household living conditions and gender-related decision-  
2 making influence child stunting in Rwanda? A population-based  
3 study

4 Jean N. Utumatwishima<sup>1,2</sup> \*¶, Ingrid Mogren<sup>3</sup>¶, Aline Umubyeyi<sup>2</sup>¶ Ali Mansourian<sup>4</sup>¶,  
5 Gunilla Krantz<sup>1</sup>¶

6 <sup>1</sup>University of Gothenburg,

7 <sup>2</sup> University of Rwanda,

8 <sup>3</sup>Umea University,

9 <sup>4</sup> Lund University

10 \*Corresponding author

11 Email: [jean.nepo.utumatwishima@gu.se](mailto:jean.nepo.utumatwishima@gu.se)

12 ¶ These authors contributed equally to this work.

13 Short title: Effect of living conditions and gender-related decision-making on child stunting in Rwanda

14 \*Corresponding author Email: [jean.nepo.utumatwishima@gu.se](mailto:jean.nepo.utumatwishima@gu.se)

15

## 16 Abstract

17 Child stunting (chronic undernutrition) is a major public health concern in low- and middle-income countries. In  
18 Rwanda, an estimated 33% of children are affected. This study investigated the household living conditions and  
19 the impact of gender-related decision-making on child stunting. The findings contribute to ongoing discussion on  
20 this critical public health issue. In December 2021, a population-based cross-sectional study was conducted in  
21 Rwanda's Northern Province; 601 women with children aged 1–36 months were included. Stunting was assessed  
22 using low height-for-age criteria. The Multidimensional Poverty Index (MPI) was used to determine household  
23 socioeconomic status. Researcher-designed questionnaires evaluated gender-related factors such as social  
24 support and household decision-making. Multivariable logistic regression analysis identified risk factor patterns.  
25 Six hundred and one children were included in the study; 27.1% ( $n=163$ ) were diagnosed as stunted; there was a  
26 higher prevalence of stunting in boys (60.1%) than girls (39.9%;  $p<0.001$ ). The MPI was 0.265 with no  
27 significant difference between households with stunted children (MPI, 0.263; 95% confidence interval [CI],  
28 0.216–0.310) and non-stunted children (MPI, 0.265; 95% CI, 0.237–0.293). Most households reported a lack of  
29 adequate housing (78.9%), electricity (63.0%), good water sources (58.7%), and proper toilets (57.1%). Male-  
30 headed households were predominant (92% vs 8.0%;  $p=0.018$ ), although women often shared decision-making  
31 with their partners; 26.4% of the women reported they were forced to have sexual intercourse within marriage  
32 ( $p=0.028$ ). Lack of support during illness (odds ratio [OR], 1.93; 95% CI, 1.13–3.28) and absence of personal  
33 guidance (OR, 2.44; 95% CI, 1.41–4.26) were significantly associated with child stunting ( $p=0.011$ ). Poverty  
34 contributes to child stunting in the Northern Province of Rwanda. Limited social support and women's lack of  
35 decision-making power in the household increase stunting rates. Interventions should empower women and  
36 address the broader social and economic context to promote both women's and children's health.

37

## 38 Introduction

39 Undernutrition has been studied extensively in different contexts in low- and middle-income  
40 countries (LMICs) [1–5]. The most consistent factors associated with childhood undernutrition in sub-  
41 Saharan Africa are as follows: women’s low education level, mothers’ age <20 years, women’s low  
42 body mass index (BMI) (<18.5 kg/m<sup>2</sup>), fathers’ low level of education, rural residence, unimproved  
43 source of drinking water, poor household wealth; further factors related to the child were low birth  
44 weight, increasing age, male sex, and episodes of diarrhea [6–8]. Different interventions to address  
45 undernutrition have been initiated and in the last decades, the global undernourishment rates have  
46 declined, which has improved the health and nutritional status in children <5 years [9]. However, there  
47 is an imbalance between the desired level of improvement in undernutrition and the nutritional  
48 interventions actually implemented [10]. Studies undertaken in sub-Saharan Africa demonstrate that the  
49 decrease in undernutrition is slow, and improvements are distributed unequally in different areas within  
50 the same country [11]. For example, families living in the northern region of Ghana had higher rates of  
51 underweight children compared with other regions due to poor socioeconomic conditions [12]. In a  
52 review that included data from Demographic and Health Surveys (DHS) in 35 LMIC countries,  
53 socioeconomic conditions were the strongest factors associated with child anthropometric failures [13].  
54 This explains why some countries initiated several interventions to reduce poverty [14]. Stunting is an  
55 outcome of chronic undernutrition that reflects poverty and failure to receive adequate nutrition over a  
56 longer period [10–12].

57 The global Multidimensional Poverty Index (MPI), created using the multidimensional measurement  
58 method of Alkire and Foster, estimates the poverty level of a country and provides details of poverty  
59 deprivations across different regions of the same country [15]. In Rwanda, based on the 2019/2020  
60 DHS data, the MPI calculated at national level was 0.231 [16]. The MPI ranges between 0 and 1, and a  
61 higher MPI indicates a greater level of poverty within a region [16].

62 Rwanda, like other LMICs, has implemented various programs to combat malnutrition, including  
63 providing each family with one cow, offering micro-nutrients to vulnerable children, as well as  
64 providing school feeding programs across the country [15]. Despite equal distribution of resources and  
65 initiatives, stunting remains a significant problem mainly in the Western and Northern Provinces of  
66 Rwanda, where 40% and 41%, respectively, of children <5 years are stunted compared with the city of  
67 Kigali, and the Eastern and Southern Provinces, where the rates are 21%, 29%, and 33%, respectively  
68 [11]. According to the Rwanda DHS reports of 2014/2015 and 2019/2020, stunting rates in other  
69 provinces have decreased, whereas the prevalence of stunting in the Northern Province has increased  
70 slightly [14, 17].

71 In addition, recent evidence shows that women's health and their position in the household are  
72 critical in relation to children's nutritional status [18, 19]. Gender refers to the roles, attributes,  
73 behaviors, and opportunities associated with being male, female, or gender non-binary [18]. Men and  
74 women display distinct health behaviors, encounter diverse health vulnerabilities, and receive varying  
75 responses from health systems. Currently, the prevalence of stunting in Rwanda is 33%. Despite the  
76 Rwandan government's extensive efforts to address stunting and promote gender equality in the  
77 country, no study has been conducted to examine the gender-related factors linked to stunting in  
78 Rwanda.

79 This research program forms part of the collaboration between the University of Rwanda and five  
80 Swedish universities, titled "Undernutrition, an interdisciplinary program focused on children and their  
81 mothers". It is designed as an interdisciplinary epidemiological study with qualitative components,  
82 divided into four different research projects. The aim of the program is to investigate the chronic  
83 problem of stunting by combining theories and methods from different fields of science  
84 (agriculture/veterinary science, public health, obstetrics, pediatrics, nutrition, geographical information  
85 systems, innovation), and to establish a pilot version of a Rwandan Medical Birth Register. The aim of

86 this study was to investigate household living conditions and the impact of gender-related decision-  
87 making on child stunting.

## 88 **Methods**

### 89 **Study design, study population, and sample size**

90 A cross-sectional study was conducted on a sample of children aged from 1 month to 3 years and  
91 their mothers who were representative of the population. The sample size was calculated based on the  
92 prevalence of stunting in the population, with a desired precision of 4% and a 95% confidence interval  
93 (CI). The final sample consisted of 630 households randomly selected from all five districts of the  
94 Northern Province. During data collection, mothers in 29 households failed to provide the necessary  
95 data for some of the analyses, giving a participation rate of 95.4% ( $N=601$ ).

96 Multi-stage random sampling was used to identify households for inclusion. The selection of the  
97 primary sampling units (villages), households, and study participants in the five districts was made in  
98 three steps. First, 186 villages were randomly selected from the total number of 2743 existing villages  
99 using the geospatial grid system. Second, households in each village were selected proportionate to the  
100 total number of households in each village. Third, a mother with a child aged 1–36 months of age was  
101 asked for an interview.

102 The community health worker responsible for the village listed all households with eligible mothers,  
103 and this list constituted the village sampling frame. The first participant to be interviewed was  
104 identified using a generated random number. Then, a calculated sampling interval in each village was  
105 applied to get the next household, depending on the number of households to be selected in each  
106 village. If the eligible person in the household was absent, the closest household on the list was  
107 selected, assuming that the living conditions between neighboring households would be similar. The  
108 selection of households also took into consideration the need for a random selection of villages and the

109 spread of measurement points for the Geographical Information System and spatial analyses to be  
110 performed by collaborators within the same project.

### 111 **Data collection procedures**

112 A comprehensive questionnaire was developed to capture a range of factors associated with  
113 undernutrition, such as sociodemographic and psychosocial factors, maternal and child health  
114 characteristics, access to food, anthropometric measures, crops, animal husbandry, and milk quality.  
115 The questionnaire was translated into Kinyarwanda, the national language in Rwanda. The questions  
116 used in this study were validated in previous studies [20–22]. The questionnaire was then implemented  
117 as an Android-based app on the emGeo platform to facilitate digital data collection and storage on a  
118 centralized cloud-based database.

119 The University of Rwanda, College of Medicine and Health Sciences, School of Public Health was  
120 the lead implementer of the survey. A group of 13 experienced interviewers comprising six PhD  
121 students, eight registered nurses, and one post-doc conducted the survey under the supervision of  
122 Rwandan and Swedish supervisors. Five days of pre-field training took place followed by 2 days to  
123 pilot the questionnaire in one selected village in the Northern Province. The data collection took place  
124 in December 2021.

### 125 **Measurement of dependent variables**

126 Stunting was defined as low height-for-age, which is measured as less than  $-2$  standard deviations of  
127 the median value of the international growth reference. The distribution of height and weight among  
128 children between 1 and 36 months was compared against the WHO Child Growth Standards reference  
129 population [23]. Weight, height, and age data were used to calculate height-for-age z scores based on  
130 the World Health Organization's anthropometric references [24]. Standard techniques were used to  
131 measure the child's weight and height. Length was measured in a recumbent position in children  $<2$   
132 years and in a standing position for children  $> 2$  years using a ShorrBoard measuring board. Weight

133 measurements were taken using SECA scales with a digital display (model number SECA 874).

134 Participating children were then categorized as stunted or not stunted.

### 135 **Measurement of independent variables**

#### 136 *Factors related to the mother and her partner*

137 Sociodemographic and psychosocial factors were categorized and analyzed as independent risk  
138 factors. The age of the mother was captured as a continuous variable and later categorized into three  
139 categories ( $\leq 20$ , 21–34, and  $\geq 35$  years of age). BMI, defined as the mother's weight in kilograms  
140 divided by the square height in meters [21], was categorized into three groups: underweight ( $\leq 18.49$   
141  $\text{kg/m}^2$ ), healthy weight (18.50–24.9  $\text{kg/m}^2$ ), and overweight (25.0–29.9  $\text{kg/m}^2$ ) (6). Marital status  
142 included five categories: cohabiting with a man/woman, divorced or separated, married in monogamy  
143 or polygamy, single mother, and widow. Marital status was dichotomized into married (or cohabiting)  
144 and living alone (being single, divorced, widowed, or separated). Educational level for both the mother  
145 and her partner consisted of any school attendance. It was categorized into incomplete primary school,  
146 complete primary school, secondary school or more. Occupation was categorized into skilled work  
147 (civil servants and students) and non-skilled work (farmers, vocational training).

#### 148 *Factors related to the children*

149 Age was measured as a continuous variable in months and categorized into three groups: 1–12  
150 months, 13–24 months, and 25–36 months. Birth weight was categorized into five groups:  $\leq 2499$  g,  
151 2500–2999 g, 3000–3499 g, 3500–3999 g, and  $\geq 4000$  g. Sex of the child was dichotomized into girls  
152 and boys. Places of birth were at home, primary health facility (health center or health post), and  
153 secondary health facility (district hospitals and other referral hospitals).

#### 154 *Factors related to the household*

155 Sex of the head of household was grouped into male or female. Mothers' marital status was  
156 categorized into married and other relationships (daughter, sister, or any other close person). Household

157 income per month was categorized into three categories ( $\leq 17,500$ , 17,501–35,999, and  $\geq 36,000$   
158 Rwandan francs).

### 159 **Women’s living conditions and household assets**

160 Core welfare indicators are key social indicators for population sub-groups. Developed jointly by the  
161 World Bank with UNDP and UNICEF, the Core Welfare Indicators Questionnaire is designed to  
162 monitor social indicators in sub-Saharan Africa on an annual basis [25]. Core welfare indicators such as  
163 the type of the house, the quality of the water source, access to electricity, distance traveled to reach an  
164 improved water source, cooking facilities, quality of toilet facilities, and assets in the household were  
165 dichotomized as improved or not improved. Assets in the household included the availability of a  
166 mobile phone, radio, television, refrigerator, bicycle, motorcycle, and a car. The composite assets index  
167 was categorized into two groups: those with no assets or only one asset, and those with two or more  
168 assets. To complete the assessment of living conditions, the global MPI was calculated for the 601  
169 households. The MPI is an international measure of acute multidimensional poverty. It complements  
170 traditional poverty measures by capturing the acute deprivations in health, education, and living  
171 standards that a person faces simultaneously [26].

### 172 **Social support and women’s power in the family**

173 The Social Support Questionnaire-Short Form, a 6-item measure of social support, was used [27].  
174 For every question, the options were “sometimes”, “often”, “always”, and “never”. The responses were  
175 dichotomized into yes (for “sometimes”, “often”, and “always” answers, equal to the reference  
176 category) and no (for “never” answers, equal to the exposure category). Social support was defined as  
177 having a friend or family member who would assist in case of illness or would share food, housing,  
178 lend money, or offer psychological guidance during problem times.

179 Women’s power at household level was assessed using the United Nations Economic Commission  
180 questionnaire for the decision-making process within households alongside selected items from the



181 Women’s Empowerment Questionnaire of the United Kingdom Data Archive [28, 29]. The following  
182 household decisions were assessed: major purchases, family visits, use of earned money, seeking  
183 personal healthcare, access to family planning, consensual sexual intercourse, and condom use during  
184 sexual intercourse. The options for these types of decisions were “joint decision”, “personal decision”,  
185 “partner’s decision”, and “other people’s decisions”. In addition, home and land ownership were  
186 assessed and recorded as joint ownership, personal ownership, or no ownership.

### 187 **Statistical analysis**

188 Prevalence (number and %) was used to describe participants’ characteristics. The dependent  
189 variable was child stunting, dichotomized into stunted and not stunted. The distribution of  
190 sociodemographic and psychosocial factors and test of difference for two groups were calculated by  
191 applying Pearson’s chi-squared test. Associations between child stunting and perceived social support  
192 were estimated by multivariable logistic regression models.  $p$  values  $\leq 0.05$  were considered statistically  
193 significant. All measures of association are presented as odds ratios (ORs) with their 95% CI.

194 The calculation of the MPI involves assigning equal weights to each dimension and equally  
195 weighting each indicator within a dimension. The following stepwise methodology was used to  
196 calculate the MPI [30]. A person's deprivation status was determined based on a cutoff, and their  
197 overall deprivation score was calculated by adding up the weights of the indicators in which they were  
198 deprived. The global MPI in this study considered seven indicators, excluding child mortality, school  
199 attendance, and cooking fuel because data on these indicators were not available in the dataset. The  
200 MPI calculation involved aggregating the dimensions and indicators using the adjusted headcount ratio  
201 formula.

202 All analyses were performed using STATA 17 SE (College Station, TX, USA).

## 203 **Ethical considerations**

204 The research protocol and study tools were approved for scientific and ethical integrity by the  
205 Institutional Review Board (IRB) of the University of Rwanda, College of Medicine and Health  
206 Sciences (review approval notice no. 181/CMHS IRB/2021) and the National Health Research  
207 Committee (no. NHRC/2020/PROT/047). The participant consent form described the purpose of the  
208 study, that participation in the study was voluntary and that refusal or withdrawal at any stage in the  
209 research process would involve no penalty or loss, currently or in the future. The interviewers obtained  
210 written consent from the respondents before the interview. The consent form explained how  
211 anthropometrics would be estimated. It was further explained that in the event of withdrawal, all data  
212 related to the woman and her child would be deleted. Participants were informed of their freedom to  
213 choose whether to answer questions, including sensitive topics such as partner violence, mental health,  
214 and child abuse. The benefits of the study for the mother, child, household, community, and country  
215 were discussed. If any participant expressed a need for health care intervention, they were referred to a  
216 nearby health center or hospital. In cases where severe illness was identified during the interview, both  
217 the mother and child were assisted in seeking health care at the nearest health facility.

## 218 **Results**

### 219 **Sociodemographic characteristics**

220 This study included women aged between 18 and 58 years, distributed across age groups; 51.7% of  
221 the children were girls and 48.3% were boys. Of the 601 children, 27.1% ( $n=163$ ) were diagnosed with  
222 stunting, and the prevalence of stunting was higher among boys than girls (60.1% vs 39.9%,  $p<0.001$ )  
223 (Table 1). Marital status, women's level of education, and occupation were equally distributed between  
224 the stunted and non-stunted groups, as were partner's age, level of education, and occupation (Table 1).  
225 Most household heads were male (92% vs 8%,  $p=0.018$ ), and most households (57.4%) earned less

226 than 17,500 RWF (~17 USD) per month, with no clear difference observed between the stunted and  
 227 non-stunted groups. House and land ownership were jointly shared between mothers and their partners  
 228 in most families and were not associated with child stunting. However, stunted children were more  
 229 likely to be found in households without a lactating cow (79.1% vs 20.9%).

230 **Table 1.** Sociodemographic and psychosocial background factors of the study population

| Variable                                    | Number of children<br>( <i>N</i> =601), <i>n</i> (%) | Children stunted, <i>n</i> (%) |                            | <i>p</i> value <sup>a</sup> |
|---------------------------------------------|------------------------------------------------------|--------------------------------|----------------------------|-----------------------------|
|                                             |                                                      | Yes ( <i>n</i> =163, 27.1%)    | No ( <i>n</i> =438, 72.9%) |                             |
| <b>Mothers</b>                              |                                                      |                                |                            |                             |
| Age group ( <i>n</i> =601)                  |                                                      |                                |                            |                             |
| ≤20 years                                   | 30 (5.0)                                             | 8 (4.9)                        | 22 (5.0)                   | 0.954                       |
| 21–34 years                                 | 352 (58.6)                                           | 94 (57.7)                      | 258 (58.9)                 |                             |
| ≥35 years                                   | 219 (36.4)                                           | 61 (37.4)                      | 158 (36.1)                 |                             |
| Body mass index ( <i>n</i> =593)            |                                                      |                                |                            |                             |
| ≤18.49 kg/m <sup>2</sup>                    | 23 (3.9)                                             | 6 (3.7)                        | 17 (3.9)                   | 0.080                       |
| 18.50–24.9 kg/m <sup>2</sup>                | 423 (71.3)                                           | 127 (78.9)                     | 296 (68.5)                 |                             |
| 25.0–29.9 kg/m <sup>2</sup>                 | 124 (20.9)                                           | 24 (14.9)                      | 100 (23.2)                 |                             |
| ≥30 kg/m <sup>2</sup>                       | 23 (3.9)                                             | 4 (2.5)                        | 19 (4.4)                   |                             |
| Marital status ( <i>n</i> =601)             |                                                      |                                |                            |                             |
| Married or cohabitating                     | 531 (88.4)                                           | 138 (84.7)                     | 393 (89.7)                 | 0.080                       |
| Single, divorced, widowed, separated        | 70 (11.6)                                            | 25 (15.3)                      | 45 (10.3)                  |                             |
| Highest level of education ( <i>n</i> =543) |                                                      |                                |                            |                             |
| Did not complete primary school             | 277 (46.1)                                           | 73 (44.8)                      | 204 (46.6)                 | 0.607                       |
| Completed primary school                    | 193 (32.1)                                           | 50 (30.7)                      | 143 (32.6)                 |                             |
| Attended secondary school and above         | 131 (21.8)                                           | 40 (24.5)                      | 91 (20.8)                  |                             |
| Occupation ( <i>n</i> =590)                 |                                                      |                                |                            |                             |
| Skilled work, civil servant, student        | 16 (2.7)                                             | 4 (2.5)                        | 12 (2.8)                   | 0.823                       |
| Non-skilled work                            | 574 (97.3)                                           | 158 (97.5)                     | 416 (97.2)                 |                             |
| <b>Husband/partner</b>                      |                                                      |                                |                            |                             |
| Age group ( <i>n</i> =529)                  |                                                      |                                |                            |                             |
| ≤20 years                                   | 3 (0.2)                                              | 0 (0.0)                        | 1 (0.3)                    | 0.648                       |

|                                               |            |            |            |        |
|-----------------------------------------------|------------|------------|------------|--------|
| 21–34 years                                   | 252 (47.6) | 69 (50.4)  | 183 (46.7) |        |
| ≥35 years                                     | 276 (52.2) | 68 (49.6)  | 208 (53.0) |        |
| Highest level of education ( <i>n</i> =476)   |            |            |            |        |
| Did not complete primary school               | 207 (43.3) | 55 (44.7)  | 152 (42.8) | 0.840  |
| Completed primary school                      | 177 (37.0) | 46 (37.4)  | 131 (36.9) |        |
| Attended secondary school and above           | 94 (19.7)  | 22 (17.9)  | 72 (20.3)  |        |
| Occupation ( <i>n</i> =522)                   |            |            |            |        |
| Skilled work, civil servant, student          | 40 (7.7)   | 9 (6.6)    | 31 (8.1)   | 0.575  |
| Non-skilled work                              | 482 (92.3) | 128 (93.4) | 354 (91.9) |        |
| <b>Children</b>                               |            |            |            |        |
| Age group ( <i>n</i> =601)                    |            |            |            |        |
| 1–12 months                                   | 216 (35.9) | 22 (13.5)  | 194 (44.3) | <0.001 |
| 13–24 months                                  | 216 (35.9) | 74 (45.4)  | 142 (32.4) |        |
| 25–36 months                                  | 169 (28.2) | 67 (41.1)  | 102 (23.3) |        |
| Birth weight ( <i>n</i> =594)                 |            |            |            |        |
| ≤2499 g                                       | 27 (4.5)   | 11 (7.0)   | 16 (3.7)   | 0.001  |
| 2500–2999 g                                   | 130 (21.9) | 49 (31.2)  | 81 (18.5)  |        |
| 3000–3499 g                                   | 241 (42.5) | 62 (39.5)  | 179 (40.9) |        |
| 3500–3999 g                                   | 161 (27.1) | 27 (17.2)  | 134 (30.7) |        |
| ≥4000 g                                       | 35 (5.9)   | 8 (5.1)    | 27 (6.2)   |        |
| Sex ( <i>n</i> =601)                          |            |            |            |        |
| Girl                                          | 311 (51.7) | 65 (39.9)  | 246 (56.2) | <0.001 |
| Boy                                           | 290 (48.3) | 98 (60.1)  | 192 (43.8) |        |
| Place of birth ( <i>n</i> =593)               |            |            |            |        |
| Home delivery                                 | 12 (2.1)   | 4 (2.5)    | 8 (1.9)    | 0.119  |
| Primary health care facility                  | 410 (69.1) | 101 (62.7) | 309 (71.5) |        |
| Secondary health care facility                | 171 (28.8) | 56 (34.8)  | 115 (26.6) |        |
| Household                                     |            |            |            |        |
| Sex of the head of household ( <i>n</i> =601) |            |            |            |        |
| Male                                          | 553 (92.0) | 143 (87.7) | 410 (93.6) | 0.018  |
| Female                                        | 48 (8.0)   | 20 (12.3)  | 28 (6.4)   |        |

| Relationship between the child's mother and the head of the household ( <i>n</i> =601) |            |            |            |       |
|----------------------------------------------------------------------------------------|------------|------------|------------|-------|
| Married couple                                                                         | 528 (87.8) | 138 (84.7) | 390 (89.0) | 0.144 |
| Other relationships (daughter, sister)                                                 | 73 (12.2)  | 25 (15.3)  | 48 (11.0)  |       |
| Household income ( <i>n</i> =595) <sup>b</sup>                                         |            |            |            |       |
| <17,500 RWF                                                                            | 340 (57.1) | 93 (57.4)  | 247 (57.0) | 0.798 |
| 17,501–35,999 RWF                                                                      | 160 (26.9) | 41 (25.3)  | 119 (27.5) |       |
| ≥36,000 RWF                                                                            | 95 (16.0)  | 28 (17.3)  | 67 (15.5)  |       |
| Availability of a milking cow ( <i>n</i> =601)                                         |            |            |            |       |
| Yes                                                                                    | 155 (25.8) | 34 (20.9)  | 121 (27.6) | 0.092 |
| No                                                                                     | 446 (74.2) | 129 (79.1) | 317 (72.4) |       |

231 <sup>a</sup>Pearson's chi-squared test.

232 <sup>b</sup>Monthly income in Rwandan Francs; 1000 RWF = 1 USD (October 2022).

233 The mean weight of mothers of stunted children was significantly lower ( $55.9 \pm 8.6$  kg) than that of  
 234 mothers of non-stunted children ( $58.9 \pm 8.5$  kg) ( $p < 0.001$ ). Similarly, the study showed that the mean  
 235 height of mothers of stunted children was  $155.7 \pm 8.5$  cm, and that of mothers of non-stunted children  
 236 was  $157.7 \pm 8.5$  cm, which was statistically significant ( $p = 0.010$ ) between the two groups. Parity was  
 237 correlated with stunting ( $p = 0.027$ ); the highest prevalence of stunting was observed among children  
 238 born to mothers with five or more children. Furthermore, a greater proportion of mothers with stunted  
 239 children (40.4%) reported poor self-rated health compared with mothers of non-stunted children  
 240 (31.0%). Stunted children had statistically significant lower birth weight ( $3049 \pm 526$  g) than non-stunted  
 241 children ( $3246 \pm 484$  g) ( $p < 0.001$ ). In addition, stunted children were older ( $22.4 \pm 8.4$  months) compared  
 242 with non-stunted children ( $16.1 \pm 9.9$  months) ( $p < 0.001$ ). Higher rates of diarrhea and fever in the 2  
 243 weeks before the survey were found in stunted children compared with non-stunted children (29.2% vs  
 244 22.1% and 33.1% vs 29.1%, respectively). The prevalence of stunting was significantly higher among  
 245 non-breastfed children (34.4%) compared with breastfed children (20.1%) ( $p < 0.001$ ). Moreover, the  
 246 prevalence of mothers' reporting poor health status in their children (19%) was higher compared with  
 247 the non-stunted group (11.4%) ( $p = 0.014$ ).

248 **Living conditions, household assets, and Multidimensional Poverty Index**

249 With regard to households, 78.4% lived in unimproved houses, and only 21.6% had improved houses  
 250 (Table 2). Of the children living in households in unimproved houses, 80.0% were stunted, whereas  
 251 only 20.0% were stunted among those living in households in improved houses. About 56.7% of  
 252 households did not have improved toilet facilities (traditional toilet facility without modern hygiene and  
 253 sanitation features) and in these households, the prevalence of stunting was 62.3%; in households with  
 254 improved toilets (sewage, flushing, and other amenities), the prevalence of stunting was 37.7%, the  
 255 difference was not statistically significant ( $p=0.097$ ). Lack of access to electricity in the household  
 256 (62.2%) was associated with 2.09 times higher odds of children being stunted compared with  
 257 households with access to electricity, even after adjusting for household monthly income, education of  
 258 the mother and the partner (adjusted OR, 2.09; 95% CI, 1.34–3.28). The prevalence of stunting was  
 259 higher among households with one or no assets (67.9 %) compared with those with two or more assets  
 260 (32.1%), and the difference was close to statistical significance ( $p=0.051$ ) (Table 2).

261 **Table 2.** Living conditions of the women and household assets ( $N=601$ )

| Variable                                          | Number of children<br>( $N=601$ ), $n$ (%) | Children stunted, $n$ (%) |                       | $p$ value <sup>a</sup> |
|---------------------------------------------------|--------------------------------------------|---------------------------|-----------------------|------------------------|
|                                                   |                                            | Yes ( $n=163$ , 27.1%)    | No ( $n=438$ , 72.9%) |                        |
| Type of house ( $n=573$ )                         |                                            |                           |                       |                        |
| Improved                                          | 124 (21.6)                                 | 31 (20.0)                 | 93 (22.3)             | 0.561                  |
| Unimproved                                        | 449 (78.4)                                 | 124 (80.0)                | 325 (77.7)            |                        |
| Water source ( $n=578$ )                          |                                            |                           |                       |                        |
| Improved                                          | 246 (42.6)                                 | 63 (39.9)                 | 183 (43.6)            | 0.423                  |
| Unimproved                                        | 332 (57.4)                                 | 95 (60.1)                 | 237 (56.4)            |                        |
| Access to electricity ( $n=598$ )                 |                                            |                           |                       |                        |
| Yes                                               | 226 (37.8)                                 | 41 (25.3)                 | 185 (42.4)            | <0.001                 |
| No                                                | 372 (62.2)                                 | 121 (74.7)                | 251 (57.6)            |                        |
| Distance to water source >30 min walk ( $n=581$ ) |                                            |                           |                       |                        |
| No                                                | 346 (59.5)                                 | 93 (58.9)                 | 253 (59.8)            | 0.836                  |

|                                          |            |            |            |       |
|------------------------------------------|------------|------------|------------|-------|
| Yes                                      | 235 (40.5) | 65 (41.1)  | 170 (40.2) |       |
| Toilet facilities ( <i>n</i> =591)       |            |            |            |       |
| Improved                                 | 256 (43.3) | 60 (37.7)  | 196 (45.4) | 0.097 |
| Not improved                             | 335 (56.7) | 99 (62.3)  | 236 (54.6) |       |
| Assets available in the household        |            |            |            |       |
| Radio ( <i>n</i> =598)                   | 243 (40.6) | 57 (35.2)  | 186 (42.7) | 0.098 |
| Mobile phone ( <i>n</i> =598)            | 513 (85.8) | 134 (82.7) | 379 (86.9) | 0.190 |
| Television set ( <i>n</i> =598)          | 22 (3.7)   | 2 (1.2)    | 20 (4.6)   | 0.053 |
| Refrigerator ( <i>n</i> =598)            | 1 (0.2)    | 0 (0.0)    | 1 (0.2)    | 0.542 |
| Bicycle ( <i>n</i> =593)                 | 70 (11.8)  | 16 (10.0)  | 54 (12.5)  | 0.408 |
| Motorcycle ( <i>n</i> =593)              | 8 (1.4)    | 0 (0.0)    | 8 (1.9)    | 0.080 |
| Car ( <i>n</i> =593)                     | 1 (0.2)    | 1 (0.6)    | 0 (0.0)    | 0.100 |
| Composite Assets index, ( <i>n</i> =598) |            |            |            |       |
| ≥2 assets and more                       | 230 (38.5) | 52 (32.1)  | 178 (40.8) | 0.051 |
| No asset or one asset only               | 368 (61.5) | 110 (67.9) | 258 (59.2) |       |

262 <sup>a</sup>Pearson's chi-squared test.

263 The MPI among households with stunted children was 0.263 (95% CI, 0.216–0.310; standard error,  
 264 0.024) (Table 3). Conversely, households without stunted children had an MPI of 0.265 (95% CI,  
 265 0.237–0.293; standard error, 0.014). The highest deprivation rates were found in the living conditions  
 266 domain; 78.9% lacked improved houses and 63.0% lacked access to electricity. In addition, 58.7%  
 267 lacked improved water sources and 57.1% lacked improved toilets. The deprivation rate for the  
 268 education domain was 44.9% for the education of mothers or their partners, and assets had a  
 269 deprivation rate of 37.2%.

270 **Table 3.** Calculation of the Multidimensional Poverty Index at household level (*N*=601)

| Nutritional status                                | MPI <sup>a</sup> | Standard error | 95% Confidence interval |             | Difference |                                        |
|---------------------------------------------------|------------------|----------------|-------------------------|-------------|------------|----------------------------------------|
|                                                   |                  |                | Lower limit             | Upper limit | MPI        | Statistically significant <sup>b</sup> |
| Households with stunted children ( <i>n</i> =163) | 0.263            | 0.024          | 0.216                   | 0.310       | 0.002      | No                                     |

|                                                         |       |       |       |       |
|---------------------------------------------------------|-------|-------|-------|-------|
| Households without stunted children<br>( <i>n</i> =438) | 0.265 | 0.014 | 0.237 | 0.293 |
| Total population ( <i>N</i> =601)                       | 0.265 | 0.012 | 0.241 | 0.289 |

271 <sup>a</sup>The Multidimensional Poverty Index (MPI) was calculated in three dimensions: health, education and living conditions.

272 <sup>b</sup>Significance means that the 95% CIs of the two populations (those with stunted children vs without stunted children) do not overlap.

### 273 **Social support and child stunting**

274 Households in which children were diagnosed with stunting exhibited a lower distribution of social  
 275 support for all six types. In the initial crude logistic regression analyses (Table 4), “lack of support  
 276 during illness” (OR, 2.01; 95% CI, 1.29–3.13) and “not having someone to provide guidance during  
 277 personal problems” (OR, 1.88; 95% CI, 1.19–3.00) were statistically significant risk factors for  
 278 children's exposure to stunting. After adjusting for covariates, including age, education, income, and  
 279 household leadership, lack of support during illness (adjusted OR, 1.93; 95% CI, 1.13–3.28) and lack of  
 280 guidance during personal problems (adjusted OR, 2.44; 95% CI, 1.41–4.26) remained statistically  
 281 significant and associated with child stunting.

282 **Table 4.** Women perceived social support and association with child stunting (*N*=601)

| Type of support                         | Number of children<br>( <i>N</i> =601), <i>n</i> (%) | Children stunted, <i>n</i> (%) |                               | Odds ratio (95% confidence interval) |                                     |
|-----------------------------------------|------------------------------------------------------|--------------------------------|-------------------------------|--------------------------------------|-------------------------------------|
|                                         |                                                      | Yes ( <i>n</i> =163,<br>27.1%) | No ( <i>n</i> =438,<br>72.9%) | Crude <sup>a</sup>                   | Adjusted <sup>b</sup>               |
| Support during illness ( <i>n</i> =594) |                                                      |                                |                               |                                      |                                     |
| Yes                                     | 488 (82.1)                                           | 120 (74.1)                     | 368 (85.2)                    | 1                                    |                                     |
| No                                      | 106 (17.8)                                           | 42 (25.9)                      | 64 (14.8)                     | <b>2.01 (1.29–3.13)</b>              | <b>1.93 (1.13–3.28)<sup>3</sup></b> |
| Sharing food ( <i>n</i> =600)           |                                                      |                                |                               |                                      |                                     |
| Yes                                     | 390 (65.0)                                           | 98 (60.1)                      | 292 (66.8)                    | 1                                    |                                     |
| No                                      | 210 (35.0)                                           | 65 (39.9)                      | 145 (33.2)                    | 1.34 (0.92–1.94)                     | 1.15 (0.74–1.77)                    |
| Sharing a house ( <i>n</i> =599)        |                                                      |                                |                               |                                      |                                     |
| Yes                                     | 350 (58.4)                                           | 85 (52.5)                      | 265 (60.6)                    | 1                                    |                                     |
| No                                      | 249 (41.6)                                           | 77 (47.5)                      | 172 (39.4)                    | 1.39 (0.97–2.01)                     | 1.40 (0.92–2.13)                    |
| Borrowing money ( <i>n</i> =600)        |                                                      |                                |                               |                                      |                                     |



|                                                         |            |            |            |                         |                                     |
|---------------------------------------------------------|------------|------------|------------|-------------------------|-------------------------------------|
| Yes                                                     | 328 (54.7) | 79 (48.5)  | 249 (57.0) | 1                       |                                     |
| No                                                      | 272 (45.3) | 84 (51.5)  | 188 (43.0) | 1.41 (0.98–2.02)        | 1.29 (0.85–1.96)                    |
| Guidance during problems ( <i>n</i> = 600)              |            |            |            |                         |                                     |
| Yes                                                     | 507 (84.5) | 127 (77.9) | 380 (87.0) | 1                       |                                     |
| No                                                      | 93 (15.5)  | 36 (22.1)  | 57 (13.0)  | <b>1.88 (1.19–3.00)</b> | <b>2.44 (1.41–4.26)<sup>3</sup></b> |
| Tangible support for personal problems ( <i>n</i> =599) |            |            |            |                         |                                     |
| Yes                                                     | 465 (77.6) | 118 (72.4) | 347 (79.6) | 1                       |                                     |
| No                                                      | 134 (22.4) | 45 (27.6)  | 89 (20.4)  | 1.49 (0.98–2.25)        | 1.44 (0.89–2.34)                    |

283 Values in bold type are statistically significant.

284 <sup>a</sup>Multivariable logistic regression with 95% confidence interval.

285 <sup>b</sup>Values are controlled for age of mothers and children, education level of mother and partner, sex of the head of the household, and  
286 household income.

## 287 Household decision-making and child stunting

288 Joint decisions between mothers and their partner/husband were most prevalent across all decision-  
289 making domains. Nonetheless, a statistically significant difference was observed between households  
290 with stunted and non-stunted children regarding the mother's decision-making autonomy in major  
291 household purchases ( $p=0.004$ ), visits to family and friends ( $p=0.016$ ), and utilization of earned money  
292 (Table 5). Specifically, 36% of the households were single-mother households, and a higher rate of  
293 stunting was found among the children in these households compared with households with two  
294 parents. Conversely, there were no statistically significant differences in joint decisions and decisions  
295 made by the husband/others between households with stunted and non-stunted children. Households  
296 with mothers who experienced forced sexual intercourse ( $n=152$ , 26.4%) (Table 5) had a statistically  
297 significantly higher prevalence of stunting (33.1%) compared with those who did not report such events  
298 (24.0%) ( $p=0.028$ ).

299 **Table 5.** Status of the women's household decision-making capacity ( $N=601$ )

| Participation in household decision-making | Number of | Children stunted | <i>p</i> value <sup>a</sup> |
|--------------------------------------------|-----------|------------------|-----------------------------|
|--------------------------------------------|-----------|------------------|-----------------------------|

|                                               | children (N=601) | Yes (n=163,<br>27.1%) | No (n=438,<br>72.9%) |       |
|-----------------------------------------------|------------------|-----------------------|----------------------|-------|
| Major household purchases (n=585)             |                  |                       |                      |       |
| Mother's decision only                        | 51 (8.7)         | 23 (14.6)             | 28 (6.6)             | 0.004 |
| Joint decision with partner/husband           | 281 (48.0)       | 78 (49.4)             | 203 (47.5)           |       |
| Husband's decision/others                     | 253 (43.3)       | 57 (36.1)             | 196 (45.9)           |       |
| Visits to family and friends (n=584)          |                  |                       |                      |       |
| Mother's decision only                        | 83 (14.2)        | 33 (20.9)             | 50 (11.7)            | 0.016 |
| Joint decision with partner/husband           | 353 (60.5)       | 91 (57.6)             | 262 (61.5)           |       |
| Husband's decision/others                     | 148 (25.3)       | 34 (21.5)             | 114 (26.8)           |       |
| Utilization of earned money (n=582)           |                  |                       |                      |       |
| Mother's decision only                        | 53 (9.1)         | 23 (14.7)             | 30 (7.1)             | 0.015 |
| Joint decision with partner/husband           | 323 (55.5)       | 85 (54.1)             | 238 (56.0)           |       |
| Husband's decision/others                     | 206 (35.4)       | 49 (31.2)             | 157 (36.9)           |       |
| Personal health care (n=585)                  |                  |                       |                      |       |
| Mother's decision only                        | 263 (45.0)       | 71 (45.2)             | 192 (44.9)           | 0.869 |
| Joint decision with partner/husband           | 228 (39.0)       | 59 (37.6)             | 169 (39.5)           |       |
| Husband's decision/others                     | 94 (16.0)        | 27 (17.2)             | 67 (15.6)            |       |
| Family planning (n=583)                       |                  |                       |                      |       |
| Mother's decision only                        | 40 (6.9)         | 11 (7.0)              | 29 (6.8)             | 0.349 |
| Joint decision with partner/husband           | 157 (26.9)       | 49 (31.2)             | 108 (25.4)           |       |
| Husband's decision/others                     | 386 (66.2)       | 97 (61.8)             | 289 (67.8)           |       |
| Experienced forced sexual intercourse (n=575) |                  |                       |                      |       |
| Yes                                           | 152 (26.4)       | 51 (33.1)             | 101 (24.0)           | 0.028 |
| No                                            | 423 (73.6)       | 103 (66.9)            | 320 (76.0)           |       |
| Condom use (n=573)                            |                  |                       |                      |       |
| Yes                                           | 301 (52.5)       | 71 (46.4)             | 201 (47.9)           | 0.758 |
| No                                            | 272 (47.5)       | 82 (53.6)             | 219 (52.1)           |       |
| Land ownership (n=586)                        |                  |                       |                      |       |
| Personal land                                 | 20 (3.4)         | 45 (28.3)             | 107 (25.1)           | 0.268 |
| Joint ownership with husband                  | 414 (70.7)       | 106 (66.7)            | 308 (72.1)           |       |

---

|                                  |            |            |            |       |
|----------------------------------|------------|------------|------------|-------|
| No land owned                    | 152 (25.9) | 8 (5.0)    | 12 (2.8)   |       |
| House ownership ( <i>n</i> =585) |            |            |            |       |
| Personal house                   | 11 (1.9)   | 6 (3.8)    | 5 (1.2)    | 0.114 |
| Joint ownership with husband     | 452 (77.3) | 119 (75.3) | 333 (78.0) |       |
| No house owned                   | 122 (20.8) | 33 (20.9)  | 89 (20.8)  |       |

---

300 <sup>a</sup>Pearson's chi-squared test.

## 301 **Discussion**

302 This study, conducted in the Northern Province of Rwanda, found that child stunting is a huge  
303 problem affecting children >1 year, and boys more often than girls. Furthermore, the MPI revealed that  
304 poverty is the primary cause of child stunting. Poor living conditions, such as the lack of electricity,  
305 were identified as a contributing factor to child stunting. Lack of decision-making power for women  
306 regarding consensual sexual intercourse, as well as inadequate support systems, are also factors that  
307 increase the likelihood of stunting in children.

### 308 **Prevalence of child stunting**

309 According to the 2019/2020 Rwanda Demographic and Health Survey (RDHS) [14], the prevalence  
310 of stunting among children <5 years old in the Northern Province was 41%, which is higher than the  
311 prevalence found in this study (27.1% among children <3 years). However, the RDHS included  
312 children up to 5 years old, whereas this study focused only on children ages 1–36 months. In addition,  
313 the prevalence of stunting in Rwanda has been declining in recent years, as indicated by data from the  
314 RDHS. A study conducted in rural Ethiopia reports a stunting prevalence of 47.9% among children  
315 aged 6–59 months, and a study conducted in Nigeria reports a prevalence of 37% among children <5  
316 years of age [23, 24]. These differences in prevalence could be attributed to variations in  
317 socioeconomic status, dietary habits, access to health care, and other factors specific to each population,  
318 but still indicate the scale of the problem in other sub-Saharan African countries.

## 319 **Child health and stunting**

320 Rwanda has made significant efforts to reduce mortality in children <5 years through various  
321 interventions, including increasing the number of antenatal care visits, involving community health  
322 workers, and implementing community-based health insurance schemes [31]. However, low birth  
323 weight and hygiene-related diseases remain prevalent in the country [32]. In our study, we found that  
324 birth weight was lower for stunted children compared with non-stunted children. Moreover, stunted  
325 children had a higher incidence of diarrhea and fever in the past 2 weeks and a greater likelihood of not  
326 being breastfed. These findings are consistent with previous studies showing that low birth weight  
327 (<2500 g) is a risk factor for stunting and other health issues later in life [33–37]. The connection  
328 between stunting, diarrhea, and fever is also well established in the literature, likely attributed to  
329 inadequate nutrition and poor living conditions that can compromise a child’s immune system [38].  
330 Furthermore, our findings reinforce the notion that breastfeeding is associated with a lower incidence of  
331 stunting because breast milk offers optimal nutrition for infants and is critical for growth and  
332 development [39]. Children who are not breastfed or who are breastfed for a short time are at an  
333 increased risk of stunting and other health problems [40].

## 334 **Mother’s health and child stunting**

335 We also found that the weight and height of mothers of stunted children were significantly lower  
336 compared with mothers of non-stunted children. This finding is consistent with other studies that have  
337 shown a relationship between maternal nutrition and stunting in children [41–43]. Therefore, improving  
338 maternal nutrition is a critical component in addressing stunting in children. In addition, parity was  
339 associated with stunting; the prevalence of stunting was highest among children of mothers with five or  
340 more children. A study conducted in Indonesia reported that children born to mothers with higher parity  
341 (defined as five children or more) were more likely to be stunted than children born to mothers with  
342 lower parity [44]. Studies in Ethiopia and Indonesia found a similar association between parity and

343 increased risk of child stunting [44, 45]. These findings suggest that there may be a cumulative effect of  
344 the number of children on maternal and child health outcomes. It highlights the importance of  
345 providing adequate antenatal care and nutrition education to women, particularly those with a higher  
346 number of children.

347 Mothers of stunted children were more likely to rate their overall health as poor compared with  
348 mothers of non-stunted children. This finding is particularly concerning because maternal health plays a  
349 critical role in child health outcomes [7, 46]. Maternal health interventions should therefore be  
350 prioritized to improve the health of mothers and their offspring. From a longer-term perspective,  
351 poverty should be alleviated, women should be better educated on how to feed their children, and as a  
352 result, many children will be healthy and consequently contribute to a reduction in overall family size.

### 353 **Living conditions and child stunting**

354 Poor living conditions, characterized by lack of assets and electricity in the household, expose  
355 children to stunting. The lack of household assets places mothers under constant stress, potentially  
356 reducing their feeding capacity and resulting in less time for child care [33]. Furthermore, children  
357 living in households without improved sanitation were more likely to be stunted than children living in  
358 households with improved sanitation. This finding has been corroborated in other studies conducted in  
359 LMICs that established the association between unimproved sanitation and stunting [35–37]. The  
360 findings of this study indicate a higher presence of radios and electricity in households with non-  
361 stunted children. The radio plays a vital role in communicating best practices for improving sanitation,  
362 as demonstrated in a study conducted in Tanzania [38]. Families lacking electricity tend to lack a radio  
363 as well, leading to a lack of crucial information on children's health priorities, exacerbating the  
364 malnutrition problem in the community.

365 The MPI score based on population survey data in the Northern Province (0.263) was higher than the  
366 national MPI (0.231) calculated using the 2019/2020 DHS data by the Oxford team in 2022 [16].

367 Similarity can be observed by comparing the stunting rate with the MPI index. Data from the  
368 2019/2020 DHS indicate the following stunting rates and their corresponding MPIs: Northern Province  
369 41% (MPI, 0.264), Western Region 40% (MPI, 0.264), Southern Region 33% (MPI, 0.251), Eastern  
370 Region 29% (MPI, 0.232), and Kigali city 21% (MPI, 0.100) [16, 47]. The findings from the Oxford  
371 group regarding MPI calculations in Rwanda and stunting estimates from the Rwanda DHS confirm  
372 that the MPI mirrors the stunting situation in a region. The higher the MPI, the higher the prevalence of  
373 stunting in the region. Regarding the deprivation profile, the lack of improved housing and electricity  
374 are the most dominant issues at the national level, as observed in the Northern Province as well.

### 375 **Social support**

376 Households with children diagnosed with stunting showed a lower incidence of social support for all  
377 six types of support. Lack of support during illness and not having someone to provide guidance during  
378 personal problems were identified as statistically significant risk factors for children's exposure to  
379 stunting. These findings are consistent with previous research that has demonstrated the importance of  
380 social support in promoting child health and development. For instance, a study in Uganda found that  
381 social support from family and community members was positively associated with child nutritional  
382 status [48]. Similarly, a study in Bangladesh found that maternal support was positively associated with  
383 child growth [49]. The present study adds to this body of research by providing evidence of the specific  
384 types of social support that are most strongly associated with child stunting. Specifically, lack of  
385 support during illness and lack of guidance during personal problems emerged as the most significant  
386 risk factors. These findings suggest that interventions aimed at improving child health and nutrition in  
387 Rwanda should focus on increasing social support for families, particularly during times of illness and  
388 personal stress.

## 389 **Household decision-making and childhood stunting**

390       Autonomy of women can be defined in various ways; it generally refers to a woman's ability to make  
391 decisions that influence herself and her family in her context [33]. Such decisions may include family  
392 matters, finances, work, social events, health care, travel, family planning, and childcare. In this study,  
393 most household decisions were reported to be made jointly by men and women in cohabiting couples,  
394 whereas in households headed by women, the decisions were solely made by the woman. Several  
395 studies conducted in sub-Saharan African countries link women's decision-making power with the  
396 nutritional status of children [34]. In the current study, women's personal decisions related to household  
397 expenses, family visits, and the use of their earnings did not protect children from malnutrition. This  
398 finding supports a study conducted in the Democratic Republic of the Congo, where female power at  
399 home did not have a positive impact on child stunting [35]. Women who lived alone, including single  
400 mothers and divorced women living in poor socioeconomic conditions, were constantly stressed and  
401 unable to provide adequate food for their children, even if they were able to make decisions. However,  
402 women who were denied the right to choose whether to have sexual intercourse tended to have stunted  
403 children. This could be because they risked becoming pregnant with unwanted children that they could  
404 not raise happily.

## 405 **Methodological considerations**

406       This study utilized a representative sample of mothers with children between 1 and 36 months of age  
407 selected from all districts in the Northern Province of Rwanda, using of spatial grid techniques.  
408 Validated questions were used to investigate social support and women's household decision-making  
409 capacity. Data collection (i.e. interviews) were conducted by experienced PhD students and licensed  
410 nurses with extensive interviewing experience. Although the study's strength lies in its comprehensive  
411 sampling approach, it is a cross-sectional study, which by definition limits the interpretation of findings  
412 regarding the direction between different gender dimensions and living conditions at the household

413 level and the nutritional status of children. Further studies are needed to support the causal relationship  
414 between household decision-making and social support on the nutritional status of children in the  
415 Rwandan context. The sensitive nature of some of the information gathered may have led to under-  
416 reporting of household difficulties faced by women, indicating that the results are not overestimated.  
417 Furthermore, the participation rate of 95.4% achieved during data collection indicates a noteworthy  
418 strength of this study. However, it should be acknowledged that in 29 households, mothers were unable  
419 to provide essential data required for specific analyses, which may have somewhat affected the  
420 representativeness of the sample.

## 421 **Conclusion**

422 Childhood stunting remains a challenging public health problem in LMICs and an indicator of  
423 human capital development that is rooted in poverty. This study in Rwanda revealed a higher  
424 prevalence of stunting in households with low social support for women. Even when women reported  
425 decision-making power within the household, it did not have a positive impact on their children's  
426 nutritional status. Therefore, multifaceted efforts to eliminate childhood stunting must address social  
427 and economic support for mothers in poor households as well as nutritional interventions that target the  
428 child as the primary beneficiary.

## 429 **Acknowledgments**

430 We would like to express our gratitude to all the mothers and children who participated in the study  
431 and graciously shared their life experiences with us. We also extend our thanks to the interviewers,  
432 community health workers, and all others involved in the study for their invaluable assistance in  
433 completing this study.



## 434 **References**

- 435 1. Victora CG, Adair L, Fall C, Hallal PC, Martorell R, Richter L, et al. Maternal and child  
436 undernutrition: consequences for adult health and human capital. *Lancet*. 2008;371:340–357.
- 437 2. Victora CG, Christian P, Vidaletti LP, Gatica-Domínguez G, Menon P, Black RE. Revisiting  
438 maternal and child undernutrition in low-income and middle-income countries: variable progress  
439 towards an unfinished agenda. *Lancet*. 2021;397:1388–1399.
- 440 3. Weatherspoon DD, Miller S, Ngabitsinze JC, Weatherspoon LJ, Oehmke JF. Stunting, food  
441 security, markets and food policy in Rwanda. *BMC Public Health*. 2019;19:882.
- 442 4. Bhutta ZA, Ahmed T, Black RE, Cousens S, Dewey K, Giugliani E, et al. What works?  
443 Interventions for maternal and child undernutrition and survival. *Lancet*. 2008;371:417–440.
- 444 5. Tesema GA, Yeshaw Y, Worku MG, Tessema ZT, Teshale AB. Pooled prevalence and associated  
445 factors of chronic undernutrition among under-five children in East Africa: a multilevel analysis.  
446 *PLoS One*. 2021;16:e0248637.
- 447 6. World Health Organization. Malnutrition in women 2023. Available from:  
448 <https://www.who.int/data/nutrition/nlis/info/malnutrition-in-women>.
- 449 7. Akombi BJ, Agho KE, Hall JJ, Wali N, Renzaho AMN, Merom D. Stunting, wasting and  
450 underweight in sub-Saharan Africa: a systematic review. *Int J Environ Res Public Health*.  
451 2017;14:863.
- 452 8. Subramanyam MA, Kawachi I, Berkman LF, Subramanian SV. Is economic growth associated  
453 with reduction in child undernutrition in India? *PLOS Med*. 2011;8:e1000424.
- 454 9. von Grebmer K. How to accelerate the end of hunger and undernutrition. *World Rev Nutr Diet*.  
455 2017;118:93–101.

- 456 10. Arnold T. Nutrition-specific and nutrition-sensitive interventions. In: Eggersdorfer M, Kraemer K,  
457 Cordaro JB, Fanzo J, Gibney M, Kennedy E, et al. editors. Good nutrition: perspectives for the  
458 21st century. Basel: S. Karger AG; 2016, pp. 276–288.
- 459 11. Amir-ud-Din R, Fawad S, Naz L, Zafar S, Kumar R, Pongpanich S. Nutritional inequalities among  
460 under-five children: a geospatial analysis of hotspots and cold spots in 73 low- and middle-income  
461 countries. *Int J Equity Health*. 2022;21:135.
- 462 12. Boah M, Azupogo F, Amporfro DA, Abada LA. The epidemiology of undernutrition and its  
463 determinants in children under five years in Ghana. *PLoS One*. 2019;14:e0219665.
- 464 13. Li Z, Kim R, Vollmer S, Subramanian SV. Factors associated with child stunting, wasting, and  
465 underweight in 35 low- and middle-income countries. *JAMA Netw Open*. 2020;3:e203386.
- 466 14. National Institute of Statistics of Rwanda (NISR), Ministry of Health (MOH), ICF. Rwanda  
467 demographic and health survey 2019-20. Kigali, Rwanda and Rockville, MD: NISR/MOH/ICF;  
468 2021.
- 469 15. Alkire S, Foster J. Counting and multidimensional poverty measurement. *J Public Econ*.  
470 2011;95(7):476–487.
- 471 16. OPHDI. Rwanda country briefing. University of Oxford: University of Oxford; 2022. Updated  
472 October 2022. Available from: [https://ophi.org.uk/multidimensional-poverty-index/mpi-country-  
473 briefings/](https://ophi.org.uk/multidimensional-poverty-index/mpi-country-briefings/).
- 474 17. National Institute of Statistics of Rwanda, Ministry of Finance, Economic Planning/Rwanda,  
475 Ministry of Health/Rwanda, ICF International. Rwanda demographic and health survey 2014-15.  
476 Kigali, Rwanda: National Institute of Statistics of Rwanda, Ministry of Finance and Economic  
477 Planning/Rwanda, Ministry of Health/Rwanda, and ICF International; 2016.

- 478 18. University College London. Gender and determinants of health: the UCL Centre for Gender,  
479 Health and Social Justice. Available from: [https://www.ucl.ac.uk/global-health/igh-centre-](https://www.ucl.ac.uk/global-health/igh-centre-list/centre-ggh)  
480 [list/centre-ggh](https://www.ucl.ac.uk/global-health/igh-centre-list/centre-ggh).
- 481 19. Manandhar M, Hawkes S, Buse K, Nosrati E, Magar V. Gender, health and the 2030 agenda for  
482 sustainable development. *Bull World Health Organ*. 2018;96:644–653.
- 483 20. Abimana MC, Karangwa E, Hakizimana I, Kirk CM, Beck K, Miller AC, et al. Assessing factors  
484 associated with poor maternal mental health among mothers of children born small and sick at 24-  
485 47 months in rural Rwanda. *BMC Pregnancy Childbirth*. 2020;20:643.
- 486 21. Ferraro AA, Rohde LA, Polanczyk GV, Argeu A, Miguel EC, Grisi SJFE, et al. The specific and  
487 combined role of domestic violence and mental health disorders during pregnancy on new-born  
488 health. *BMC Pregnancy Childbirth*. 2017;17:257.
- 489 22. Çalgi B. The relationship between mothers and mental health and violence against their children. *J*  
490 *Health Rep Technol*. 2020;7:e109265.
- 491 23. World Health Organization. Child growth standards 2006. Available from:  
492 <https://www.who.int/tools/child-growth-standards>.
- 493 24. Tosheno D, Mehretie Adinew Y, Thangavel T, Bitew Workie S. Risk factors of underweight in  
494 children aged 6-59 months in Ethiopia. *J Nutr Metab*. 2017;2017:6368746.
- 495 25. International Household Survey Network. Core welfare indicators questionnaire survey 2019.  
496 Available from: <http://catalog.ihsn.org/catalog/4387/related-materials>.
- 497 26. Oxford Poverty and Human Development Initiative. What is the global MPI? 2022. Available  
498 from: <https://ophi.org.uk/multidimensional-poverty-index/>.
- 499 27. Sarason IG, Sarason BR, Shearin EN, Pierce GR. A brief measure of social support: practical and  
500 theoretical implications. *J Soc Pers Relat*. 1987;4:497–510.

- 501 28. United Nations Economic Commission Steering Committee. Measuring power and decision-  
502 making within the household 2016 Available from:  
503 [https://www.unece.org/fileadmin/DAM/stats/documents/ece/ces/ge.30/2016/WS/WP19\\_UNECE](https://www.unece.org/fileadmin/DAM/stats/documents/ece/ces/ge.30/2016/WS/WP19_UNECE_Willis.pdf)  
504 [Willis.pdf](https://www.unece.org/fileadmin/DAM/stats/documents/ece/ces/ge.30/2016/WS/WP19_UNECE_Willis.pdf).
- 505 29. UK Dataservice PAWE. Household survey for evaluation of Indonesia women's empowerment  
506 project 2013. Available from:  
507 [http://doc.ukdataservice.ac.uk/doc/7888/mrdoc/pdf/7888\\_indonesia\\_pawe\\_questionnaire.pdf](http://doc.ukdataservice.ac.uk/doc/7888/mrdoc/pdf/7888_indonesia_pawe_questionnaire.pdf).
- 508 30. Alkire S. A methodological note on the global Multidimensional Poverty Index (MPI) 2022  
509 changes over time results for 84 countries', OPHI MPI Methodological Note 54 University of  
510 Oxford: Oxford Poverty and Human Development Initiative (OPHI). 2022. Available from:  
511 [https://www.ophi.org.uk/wp-content/uploads/OPHI\\_MPI\\_MN\\_54\\_2022.pdf](https://www.ophi.org.uk/wp-content/uploads/OPHI_MPI_MN_54_2022.pdf).
- 512 31. Umuhzoza SM, Musange SF, Nyandwi A, Gatome-Munyua A, Mumararungu A, Hitimana R, et al.  
513 Strengths and weaknesses of strategic health purchasing for universal health coverage in Rwanda.  
514 Health Syst Reform. 2022;8:e2061891.
- 515 32. Uwimana G, Elhoumed M, Gebremedhin MA, Azalati MM, Nan L, Zeng L. Association between  
516 quality antenatal care and low birth weight in Rwanda: a cross-sectional study design using the  
517 Rwanda demographic and health surveys data. BMC Health Serv Res. 2023;23:558.
- 518 33. de Onis M, Dewey KG, Borghi E, Onyango AW, Blössner M, Daelmans B, et al. The World  
519 Health Organization's global target for reducing childhood stunting by 2025: rationale and  
520 proposed actions. Matern Child Nutr. 2013;9 Suppl 2:6–26.
- 521 34. Halli SS, Biradar RA, Prasad JB. Low birth weight, the differentiating risk factor for stunting  
522 among preschool children in India. Int J Environ Res Public Health. 2022;19:3751.

- 523 35. Aryastami NK, Shankar A, Kusumawardani N, Besral B, Jahari AB, Achadi E. Low birth weight  
524 was the most dominant predictor associated with stunting among children aged 12–23 months in  
525 Indonesia. *BMC Nutrition*. 2017;3:16.
- 526 36. Abbas F, Kumar R, Mahmood T, Somrongthong R. Impact of children born with low birth weight  
527 on stunting and wasting in Sindh province of Pakistan: a propensity score matching approach. *Sci*  
528 *Rep*. 2021;11:19932.
- 529 37. Aboagye RG, Ahinkorah BO, Seidu AA, Frimpong JB, Archer AG, Adu C, et al. Birth weight and  
530 nutritional status of children under five in sub-Saharan Africa. *PLoS One*. 2022;17:e0269279.
- 531 38. Weisz A, Meuli G, Thakwalakwa C, Trehan I, Maleta K, Manary M. The duration of diarrhea and  
532 fever is associated with growth faltering in rural Malawian children aged 6-18 months. *Nutr J*.  
533 2011;10:25.
- 534 39. Ahmed T, Mahfuz M, Ireen S, Ahmed AM, Rahman S, Islam MM, et al. Nutrition of children and  
535 women in Bangladesh: trends and directions for the future. *J Health Popul Nutr*. 2012;30:1–11.
- 536 40. Biks GA, Berhane Y, Worku A, Gete YK. Exclusive breast feeding is the strongest predictor of  
537 infant survival in Northwest Ethiopia: a longitudinal study. *J Health Popul Nutr*. 2015;34:9.
- 538 41. Saleh A, Syahrul S, Hadju V, Andriani I, Restika I. Role of maternal in preventing stunting: a  
539 systematic review. *Gac Sanit*. 2021;35:S576–S582.
- 540 42. Amaha ND, Woldeamanuel BT. Maternal factors associated with moderate and severe stunting in  
541 Ethiopian children: analysis of some environmental factors based on 2016 demographic health  
542 survey. *Nutr J*. 2021;20:18.
- 543 43. Kirschenbaum A, Swanson Z, Welsh C. Investments in the future: reversing the dire state of  
544 maternal nutrition 2023. Available from: [https://www.csis.org/analysis/investments-future-](https://www.csis.org/analysis/investments-future-reversing-dire-state-maternal-nutrition)  
545 [reversing-dire-state-maternal-nutrition](https://www.csis.org/analysis/investments-future-reversing-dire-state-maternal-nutrition).

- 546 44. Sari K, Sartika RAD. The effect of the physical factors of parents and children on stunting at birth  
547 among newborns in Indonesia. *J Prev Med Public Health*. 2021;54:309–316.
- 548 45. Dake SK, Solomon FB, Bobe TM, Tekle HA, Tufa EG. Predictors of stunting among children 6-  
549 59 months of age in Sodo Zuria District, South Ethiopia: a community based cross-sectional study.  
550 *BMC Nutr*. 2019;5:23.
- 551 46. Olofin I, McDonald CM, Ezzati M, Flaxman S, Black RE, Fawzi WW, et al. Associations of  
552 suboptimal growth with all-cause and cause-specific mortality in children under five years: a  
553 pooled analysis of ten prospective studies. *PLoS One*. 2013;8(5):e64636.
- 554 47. National Institute of Statistics of Rwanda N, Ministry of Health, ICF. Rwanda demographic and  
555 health survey 2019-20. Kigali, Rwanda and Rockville, MD: NISR/MOH/ICF; 2021.
- 556 48. Ickes SB, Wu M, Mandel MP, Roberts AC. Associations between social support, psychological  
557 well-being, decision making, empowerment, infant and young child feeding, and nutritional status  
558 in Ugandan children ages 0 to 24 months. *Matern Child Nutr*. 2018;14:e12483.
- 559 49. Basnet S, Frongillo EA, Nguyen PH, Moore S, Arabi M. Maternal resources for care are  
560 associated with child growth and early childhood development in Bangladesh and Vietnam. *Child  
561 Care Health Dev*. 2022;48:120–128.

562
